# Supplementary material
Source: PubMed Central journal article supplement (PMC5315512)
Supplement: ejhg2016176x1.pdf [file ejhg2016176x1.pdf]

**Table S1:** Genes associated with mandibulo-facial and/or ear malformations analysed by next generation sequencing\*.

| <b>Gene</b>       | <b>Target region (bp)</b> | <b>Coverage (%)</b> |
|-------------------|---------------------------|---------------------|
| <i>B3GALTL</i>    | 1797                      | 100                 |
| <i>CHD7</i>       | 9778                      | 99,89               |
| <i>DHODH</i>      | 1368                      | 100                 |
| <i>EDN1</i>       | 739                       | 100                 |
| <i>EFTUD2</i>     | 3459                      | 100                 |
| <i>EYA1</i>       | 2281                      | 100                 |
| <i>FGF10</i>      | 687                       | 100                 |
| <i>FGF3</i>       | 780                       | 100                 |
| <i>FGFR2</i>      | 3324                      | 100                 |
| <i>FGFR3</i>      | 3360                      | 100                 |
| <i>GJA1</i>       | 1169                      | 100                 |
| <i>GNAI3</i>      | 1259                      | 100                 |
| <i>NFIX</i>       | 1847                      | 100                 |
| <i>PLCB4</i>      | 4375                      | 99,73               |
| <i>POLRIC</i>     | 1348                      | 99,70               |
| <i>POLRID</i>     | 825                       | 100                 |
| <i>SALL1</i>      | 4039                      | 100                 |
| <i>SALL4</i>      | 3242                      | 100                 |
| <i>SEMA3E</i>     | 2693                      | 100                 |
| <i>SF3B4</i>      | 1395                      | 100                 |
| <i>SIX1</i>       | 895                       | 100                 |
| <i>SIX5</i>       | 2280                      | 99,82               |
| <i>TCOF1</i>      | 5159                      | 100                 |
| <i>TFAP2A</i>     | 1897                      | 100                 |
| <i>TSHZ1</i>      | 3119                      | 100                 |
| <b>Gene Panel</b> | <b>63115</b>              | <b>99,95</b>        |

\* A custom panel for the targeted enrichment of 25 genes associated with mandibulo-facial and/or ear malformations was designed using the SureDesign software v3.0.3.1 (Agilent Technologies, Santa Clara, CA, United States). The gene panel contained 3670 amplicons and the coverage of the target regions (coding sequences and 10 bp flanking sequences) was 99.95 %. The target sequences of the investigated genes were isolated and captured using the HaloPlex Target Enrichment system (Agilent Technologies).

**Table S2:** Variants identified in patient P1 in genes involved in cranio-facial and/or ear malformations analysed by next generation sequencing.

| Gene           | HGVS (Genomic)              | HGVS (Coding)            | HGVS (Protein)             | Read Depth | Allele Frequency | HOM/HET | dbSNP      | MAF dbSNP |
|----------------|-----------------------------|--------------------------|----------------------------|------------|------------------|---------|------------|-----------|
| <i>SF3B4</i>   | NC_000001.10:g.149898557G>A | NM_005850.4:c.417C>T     | NP_005841.1:p.(Gly139=)    | 408        | 0.455            | HET     |            |           |
| <i>FGFR3</i>   | NC_000004.11:g.1803704T>C   | NM_000142.4:c.882T>C     | NP_000133.1:p.(Asn294=)    | 778        | 0.996            | HOM     | rs2234909  | 0.2075    |
| <i>FGFR3</i>   | NC_000004.11:g.1807894G>A   | NM_000142.4:c.1953A>G    | NP_000133.1:p.(Thr651=)    | 337        | 0.997            | HOM     | rs7688609  | 0.0439    |
| <i>TCOF1</i>   | NC_000005.9:g.149772280C>G  | NM_000356.3:c.3296C>G    | NP_000347.2:p.(Pro1099Arg) | 465        | 0.489            | HET     | rs1136103  | 0.0815    |
| <i>EDN1</i>    | NC_000006.11:g.12294258A>G  | NM_001955.4:c.318A>G     | NP_001946.3:p.(Glu106=)    | 428        | 0.998            | HOM     | rs5369     | 0.0986    |
| <i>EDN1</i>    | NC_000006.11:g.12296255G>T  | NM_001955.4:c.594G>T     | NP_001946.3:p.(Lys198Asn)  | 360        | 0.446            | HET     | rs5370     | 0.2474    |
| <i>SEMA3E</i>  | NC_000007.13:g.83029438C>T  | NM_012431.2:c.1272G>A    | NP_036563.1:p.(Leu424=)    | 1399       | 0.999            | HOM     | rs2722974  | 0.3395    |
| <i>SEMA3E</i>  | NC_000007.13:g.83037751C>A  | NM_012431.2:c.603G>T     | NP_036563.1:p.(Ala201=)    | 524        | 0.998            | HOM     | rs2722985  | 0.4437    |
| <i>EYAI</i>    | NC_000008.10:g.72111599A>G  | NM_000503.5:c.1755T>C    | NP_000494.2:p.(His585=)    | 267        | 0.481            | HET     | rs10103397 | 0.4766    |
| <i>FGFR2</i>   | NC_000010.10:g.123239112G>A | NM_001144915.1:c.2107C>T | NP_001138387.1:p.(Leu703=) | 186        | 0.46             | HET     | rs1047057  | 0.4143    |
| <i>FGFR2</i>   | NC_000010.10:g.123298158T>C | NM_000141.4:c.696A>G     | NP_000132.3:p.(Val232=)    | 484        | 0.495            | HET     | rs1047100  | 0.2047    |
| <i>POLR1D</i>  | NC_000013.10:g.28239940G>C  | NM_152705.2:c.219G>C     | NP_689918.1:p.(Ala73=)     | 535        | 0.481            | HET     | rs11029    | 0.2578    |
| <i>POLR1D</i>  | NC_000013.10:g.28239970G>A  | NM_152705.2:c.249G>A     | NP_689918.1:p.(Pro83=)     | 536        | 0.499            | HET     | rs14105    | 0.3718    |
| <i>B3GALTL</i> | NC_000013.10:g.31821240C>T  | NM_194318.3:c.347+4C>T   |                            | 743        | 0.48             | HET     | rs9564692  | 0.496     |
| <i>B3GALTL</i> | NC_000013.10:g.31821992T>C  | NM_194318.3:c.348T>C     | NP_919299.3:p.(His116=)    | 356        | 0.997            | HOM     | rs4943266  | 0.0246    |
| <i>B3GALTL</i> | NC_000013.10:g.31891746G>A  | NM_194318.3:c.1108G>A    | NP_919299.3:p.(Glu370Lys)  | 119        | 0.417            | HET     | rs1041073  | 0.3333    |
| <i>SALL1</i>   | NC_000016.9:g.51171175C>T   | NM_002968.2:c.3823G>A    | NP_002959.2:p.(Val1275Ile) | 429        | 0.998            | HOM     | rs4614723  | 0.0132    |
| <i>SALL1</i>   | NC_000016.9:g.51173559G>A   | NM_002968.2:c.2574C>T    | NP_002959.2:p.(Leu858=)    | 851        | 0.998            | HOM     | rs1965024  | 0.4613    |
| <i>DHODH</i>   | NC_000016.9:g.72042682A>C   | NM_001361.4:c.19A>C      | NP_001352.2:p.(Lys7Gln)    | 450        | 0.488            | HET     | rs3213422  | 0.4359    |
| <i>EFTUD2</i>  | NC_000017.10:g.42949808G>A  | NM_004247.3:c.994+6C>T   |                            | 310        | 0.479            | HET     | rs11654183 | 0.2426    |
| <i>EFTUD2</i>  | NC_000017.10:g.42961009C>T  | NM_004247.3:c.426+8G>A   |                            | 640        | 0.456            | HET     | rs2289677  | 0.4395    |
| <i>PLCB4</i>   | NC_000020.10:g.9288522G>A   | NM_000933.3:c.61G>A      | NP_000924.3:p.(Ala21Thr)   | 576        | 0.998            | HOM     | rs6077510  | 0.4714    |
| <i>SALL4</i>   | NC_000020.10:g.50406630T>G  | NM_020436.3:c.2392A>C    | NP_065169.1:p.(Ile798Leu)  | 278        | 0.534            | HET     | rs6091375  | 0.0657    |
| <i>SALL4</i>   | NC_000020.10:g.50407162T>C  | NM_020436.3:c.1860A>G    | NP_065169.1:p.(Thr620=)    | 459        | 0.485            | HET     | rs6021437  | 0.382     |
| <i>SALL4</i>   | NC_000020.10:g.50407502A>C  | NM_020436.3:c.1520T>G    | NP_065169.1:p.(Leu507Arg)  | 224        | 0.493            | HET     | rs6126344  | 0.3588    |
| <i>SALL4</i>   | NC_000020.10:g.50407966C>T  | NM_020436.3:c.1056G>A    | NP_065169.1:p.(Ala352=)    | 213        | 0.533            | HET     | rs13038893 | 0.2093    |
| <i>SALL4</i>   | NC_000020.10:g.50408482A>G  | NM_020436.3:c.540T>C     | NP_065169.1:p.(Asn180=)    | 304        | 0.997            | HOM     | rs6013281  | 0.0026    |

**Table S3:** *In silico* predictions of the effect of the c.417C>T variant in *SF3B4* exon 3 on splicing.

|                              | <b>Predicted Effect</b>                   | <b>Wild-type allele</b>                          | <b>Mutant allele</b>                            |
|------------------------------|-------------------------------------------|--------------------------------------------------|-------------------------------------------------|
| <b>NNSPLICE v. 0.9</b>       | Activation of a cryptic exonic donor site | Splice site not detected                         | Score: 0.99                                     |
| <b>NetGene2 v. 2.4</b>       | Activation of a cryptic exonic donor site | Splice site not detected                         | Score: 0.83                                     |
| <b>Human Splicing Finder</b> | Activation of a cryptic exonic donor site | HSF matrices score: 61.15<br>MaxEnt score : 0.87 | HSF matrices score: 87.99<br>MaxEnt score: 8.63 |
|                              | Alterarion of an exonic ESE site          |                                                  | ESE site broken                                 |
